# Supplementary material for: Tripal EUtils: a Tripal module to increase exchange and reuse of genome assembly metadata
Source: Oxford University Press journal article supplement (doi:10.1093/database/baz143), 2019-11-22
Supplement: supplementary_materials_baz143.docx [file supplementary_materials_baz143.docx]

| **XML** | **Chado Base Table** | **Chado Column** |
| --- | --- | --- |
| Taxon->ScientificName | organism | genus |
| Taxon->ScientificName | organism | species |
| IdList->Id | organism_dbxref | dbxref.accession |
| Taxon->Rank | organism | type_id |
| Taxon->OtherNames->CommonName | organism | commonname |
| Taxon->ScientificName (if included) | organism | infraspecific_name |
| NA | organism | comment |

Table S1. Mappings for NCBITaxon metadata into the Chado organism and organism_dbxref tables, based on Tripal core importers.

| **XML** | **Property term** |
| --- | --- |
| Taxon->Lineage | local:lineage |
| Taxon->GeneticCode->GCId | local:genetic_code |
| Taxon->GeneticCode->GCName | local:genetic_code_name |
| Taxon->MitoGeneticCode->MGCId | local:mitochondrial_genetic_code |
| Taxon->MitoGeneticCode->MGCName | local:mitochondrial_genetic_code_name |
| Taxon->Division | local:division |
| Taxon->OtherNames->GenbankCommonName | local:genbank_common_name |
| Taxon->OtherNames->Synonym | local:synonym |
| Taxon->OtherNames->GenbankSynonym | local:synonym |
| Taxon->OtherNames->Includes | local:other_name |
| Taxon->OtherNames->EquivalentName | local:equivalent_name |
| Taxon->OtherNames->Anamorph | local:anamorph |

Table S2. NCBITaxon to Chado Organism property mappings. Properties are inserted in the

chado.organismprop table.

| **XML** | **Chado Base Table** | **Chado Column** |
| --- | --- | --- |
| Journal | pub | title |
| NA | pub | volumetitle |
| Volume | pub | volume |
| NA | pub | series_name |
| Issue | pub | issue |
| PubDate | pub | pyear |
| MedlinePgn | pub | pages |
| NA | pub | miniref |
| (Citation built from multiple keys) | pub | uniquename |
| PublicationType | pub | type_id |
| NA | pub | publisher |
| NA | pub | pubplace |
| AuthorList | pubauthor | surname/givennames/suffix |

Table S3. Pubmed XML to Chado pub and pubauthor mappings, based on Tripal core importers.


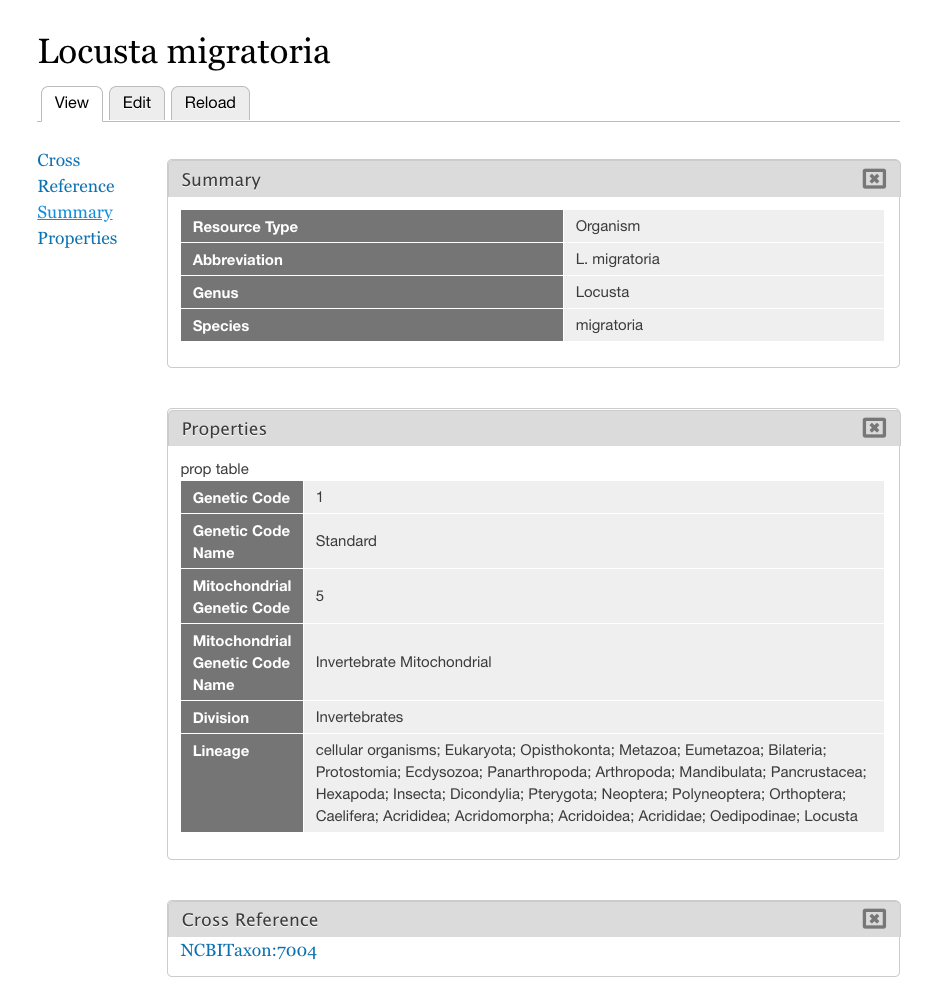


Figure S1. Imported NCBI Taxon 7004 (Locusta migratoria).


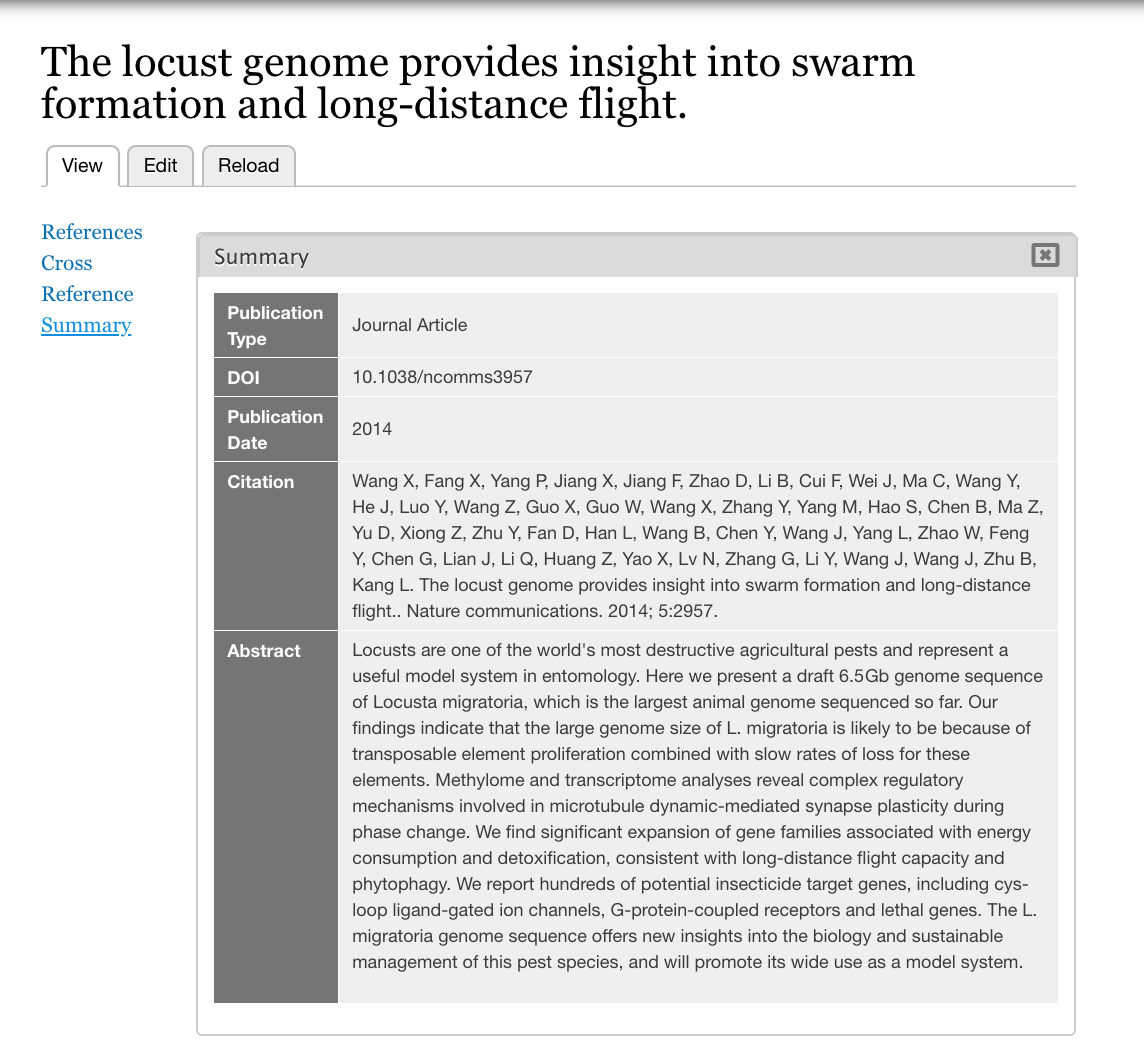


Figure S2. Imported Pubmed ID 24423660.
